# Supplementary material for: Net-stacked hierarchical CdOHF architectures: controllable synthesis and visible-light driven photocatalytic performance
Source: Royal Society of Chemistry journal article supplement (doi:10.1039/d1ce01154e), 2021-01-01
Supplement: d1ce01154e1.pdf [file d1ce01154e1.pdf]

# **Nets-stacked hierarchical CdOHF architectures: controllable synthesis and visible-light driven photocatalytic performance**

Yingying Guo<sup>a</sup>, Chi Wang<sup>a</sup>, Huihui Cui<sup>a</sup>, Miao Wang<sup>a,b,\*</sup>, Tongming

Sun<sup>a,b,\*</sup> and Yanfeng Tang<sup>a,b,\*</sup>

---

<sup>a</sup> School of Chemistry and Chemical Engineering, Nantong University, Nantong 226019, PRChina.

<sup>b</sup> Nantong Key Lab of Intelligent and New Energy Materials, Nantong 226019, P. R. China.

\*Corresponding author. E-mail: [hi\\_wangmiao@163.com](mailto:hi_wangmiao@163.com); [stm7314@ntu.edu.cn](mailto:stm7314@ntu.edu.cn); [tangyf@ntu.edu.cn](mailto:tangyf@ntu.edu.cn)

Table S1 Summary of the reaction conditions and morphologies of the products.

| pH   | Temperature/Time | XRD                        | Morphology              |
|------|------------------|----------------------------|-------------------------|
| 11   | 120°C /1h        | Cd(OH) <sub>2</sub>        | nanoplates              |
| 11   | 120°C /3h        | Cd(OH) <sub>2</sub> +CdOHF | nanoplates+nets         |
| 11   | 120°C /6h        | Cd(OH) <sub>2</sub> +CdOHF | nanoplates+nets-stacked |
| 11   | 120°C /9h        | Cd(OH) <sub>2</sub> +CdOHF | nanoplates+nets-stacked |
| 11   | 120°C /12h       | CdOHF                      | nets-stacked            |
| 11   | 120°C /24h       | CdOHF                      | nets-stacked            |
| 4    | 120°C /12h       | ---                        | ---                     |
| 8    | 120°C /12h       | ---                        | ---                     |
| 9    | 120°C /12h       | CdOHF                      | nanorods                |
| 10   | 120°C /12h       | CdOHF                      | nets                    |
| 12.5 | 120°C /12h       | Cd(OH) <sub>2</sub> +CdOHF | nanoplates+nets-stacked |
| 13   | 120°C /12h       | Cd(OH) <sub>2</sub>        | nanoplates              |

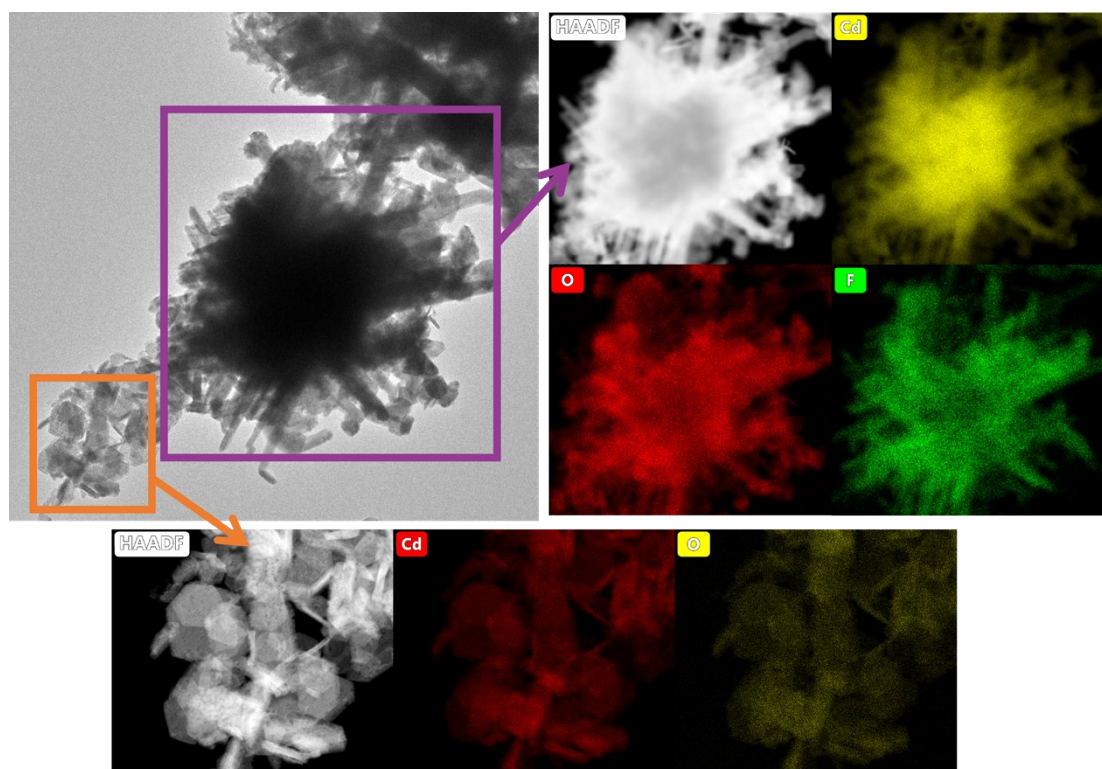

Fig. S1 TEM elemental mapping images of the mixture of Cd(OH)<sub>2</sub> nanoplates and nets-stacked hierarchical CdOHF obtained from 6 h.

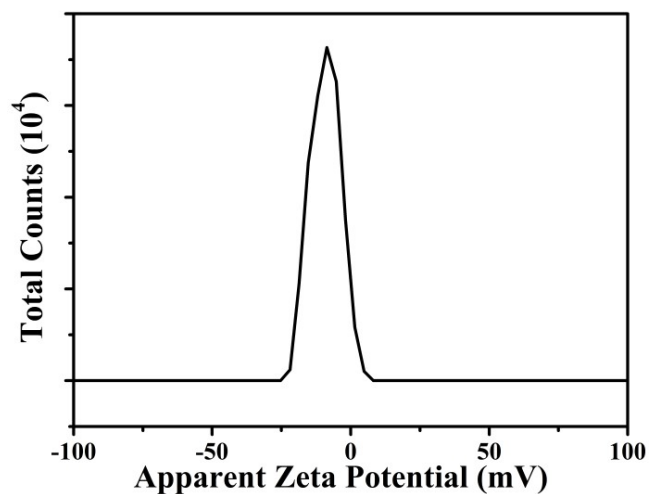

Fig. S2 Zeta potential of the nets-stacked hierarchical CdOHF in water.

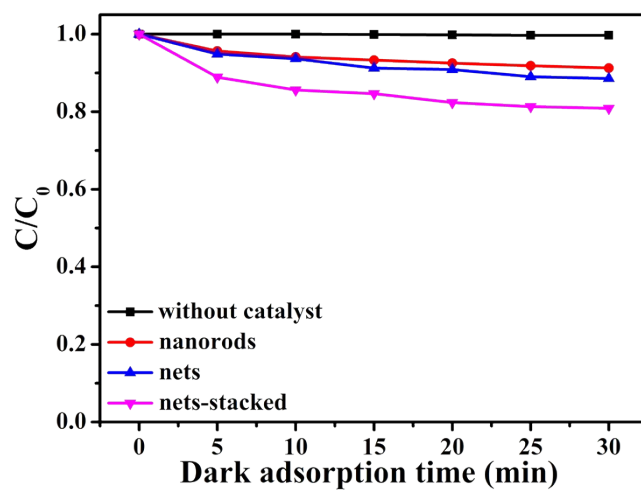

Fig. S3 The dark adsorption behaviors of different morphological samples.

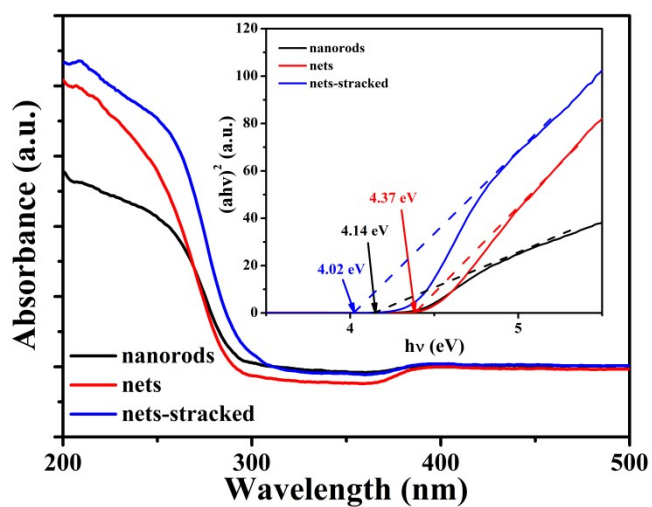

Fig. S4 DRS of CdOHF with different morphologies.

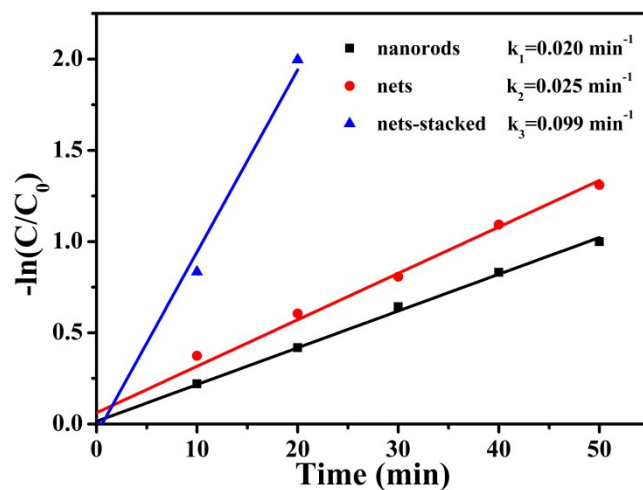

Fig. S5 Pseudo-first order degradation kinetics of CdOHF with different morphologies.

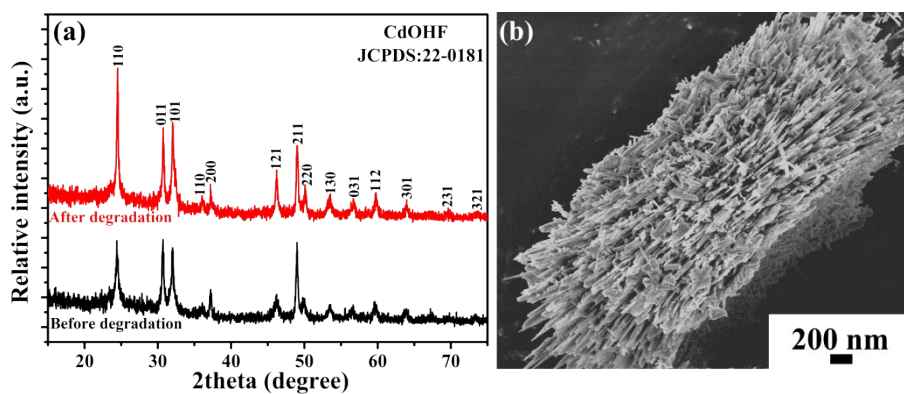

Fig. S6 (a) XRD and (b) SEM of nets-stacked hierarchical CdOHF after degradation.
